# Supplementary material for: Persistent high prevalence of modifiable cardiovascular risk factors among patients with osteoarthritis in the UK in 1992–2017
Source: PubMed Central journal article supplement — RMD Open. 2023 Aug 30;9(3):e003298. doi: 10.1136/rmdopen-2023-003298 (PMC10471862; doi:10.1136/rmdopen-2023-003298), 2023-08-30

## Online Supplemental File

## Supplementary Table S1 Population distribution by calendar year

| Calendar year of index consultation, n (%) | Osteoarthritis | Non-Osteoarthritis |
|--------------------------------------------|----------------|--------------------|
| 1992                                       | 905 (0.42)     | 905 (0.42)         |
| 1993                                       | 2,362 (1.10)   | 2,362 (1.10)       |
| 1994                                       | 2,970 (1.38)   | 2,970 (1.38)       |
| 1995                                       | 3,248 (1.51)   | 3,248 (1.51)       |
| 1996                                       | 3,879 (1.80)   | 3,879 (1.80)       |
| 1997                                       | 4,522 (2.10)   | 4,522 (2.10)       |
| 1998                                       | 5,031 (2.34)   | 5,031 (2.34)       |
| 1999                                       | 5,478 (2.55)   | 5,478 (2.55)       |
| 2000                                       | 5,572 (2.59)   | 5,572 (2.59)       |
| 2001                                       | 6,074 (2.82)   | 6,074 (2.82)       |
| 2002                                       | 7,248 (3.37)   | 7,248 (3.37)       |
| 2003                                       | 9,449 (4.39)   | 9,449 (4.39)       |
| 2004                                       | 11,210 (5.21)  | 1,1210 (5.21)      |
| 2005                                       | 12,952 (6.02)  | 1,2952 (6.02)      |
| 2006                                       | 13,720 (6.38)  | 1,3720 (6.38)      |
| 2007                                       | 15,946 (7.41)  | 15,946 (7.41)      |
| 2008                                       | 18,391 (8.55)  | 18,391 (8.55)      |
| 2009                                       | 15,698 (7.29)  | 15,698 (7.29)      |
| 2010                                       | 12,890 (5.99)  | 12,890 (5.99)      |
| 2011                                       | 11,314 (5.26)  | 11,314 (5.26)      |
| 2012                                       | 9,718 (4.52)   | 9,718 (4.52)       |
| 2013                                       | 8,738 (4.06)   | 8,738 (4.06)       |
| 2014                                       | 8,245 (3.83)   | 8,245 (3.83)       |
| 2015                                       | 7,470 (3.47)   | 7,470 (3.47)       |
| 2016                                       | 6,358 (2.95)   | 6,358 (2.95)       |
| 2017                                       | 5,802 (2.70)   | 5,802 (2.70)       |

**Supplementary Table S2: Period prevalence of single and clustering modifiable cardiovascular risk factors in osteoarthritis and non-osteoarthritis populations by geographical region in the United Kingdom between 1992-2017**

| Region                 | Osteoarthritis |           |                      | Non-osteoarthritis |           |                      |
|------------------------|----------------|-----------|----------------------|--------------------|-----------|----------------------|
|                        | Denominator    | Numerator | Prevalence (95%CI)   | Denominator        | Numerator | Prevalence (95%CI)   |
| <b>Current smoking</b> |                |           |                      |                    |           |                      |
| North East             | 4,593          | 1,221     | 26.58 (25.31, 27.89) | 4,593              | 950       | 20.68 (19.52, 21.88) |
| North West             | 27,200         | 7,253     | 26.67 (26.14, 27.20) | 27,205             | 5,919     | 21.76 (21.27, 22.25) |
| Yorkshire & The Humber | 9,277          | 2,545     | 27.43 (26.53, 28.35) | 9,275              | 1,880     | 20.27 (19.46, 21.10) |
| East Midlands          | 8,960          | 2,451     | 27.35 (26.43, 28.29) | 8,957              | 1,879     | 20.98 (20.14, 21.84) |
| West Midlands          | 22,256         | 5,472     | 24.59 (24.02, 25.16) | 22,250             | 4,357     | 19.58 (19.06, 20.11) |
| East of England        | 18,103         | 4,193     | 23.16 (22.55, 23.78) | 18,101             | 3,239     | 17.89 (17.34, 18.46) |
| South West             | 18,251         | 4,452     | 24.39 (23.77, 25.02) | 18,249             | 3,056     | 16.75 (16.21, 17.30) |
| South Central          | 20,656         | 4,342     | 21.02 (20.47, 21.58) | 20,655             | 3,178     | 15.39 (14.90, 15.89) |
| London                 | 15,763         | 3,665     | 23.25 (22.59, 23.92) | 15,767             | 2,639     | 16.74 (16.16, 17.33) |
| South East Coast       | 19,290         | 3,741     | 19.39 (18.84, 19.96) | 19,294             | 2,824     | 14.64 (14.14, 15.14) |
| Northern Ireland       | 6,430          | 1,595     | 24.81 (23.75, 25.88) | 6,434              | 1,297     | 20.16 (19.18, 21.16) |
| Scotland               | 20,521         | 5,289     | 25.77 (25.18, 26.38) | 20,519             | 4,559     | 22.22 (21.65, 22.79) |
| Wales                  | 23,890         | 5,580     | 23.36 (22.82, 23.90) | 23,891             | 4,388     | 18.37 (17.88, 18.86) |
| <b>Hypertension</b>    |                |           |                      |                    |           |                      |
| North East             | 4,593          | 1,564     | 34.05 (32.68, 35.44) | 4,593              | 1,253     | 27.28 (26.00, 28.59) |
| North West             | 27,200         | 9,883     | 36.33 (35.76, 36.91) | 27,205             | 7,913     | 29.09 (28.55, 29.63) |
| Yorkshire & The Humber | 9,277          | 3,087     | 33.28 (32.28, 34.25) | 9,275              | 2,295     | 24.74 (23.87, 25.64) |
| East Midlands          | 8,960          | 3,091     | 34.50 (33.51, 35.49) | 8,957              | 2,422     | 27.04 (26.12, 27.97) |
| West Midlands          | 22,256         | 8,252     | 37.08 (36.44, 37.72) | 22,250             | 6,585     | 29.60 (29.00, 30.20) |
| East of England        | 18,103         | 6,392     | 35.31 (34.61, 36.01) | 18,101             | 4,748     | 26.23 (25.59, 26.88) |
| South West             | 18,251         | 6,939     | 38.02 (37.31, 38.73) | 18,249             | 4,502     | 24.67 (24.05, 25.30) |
| South Central          | 20,656         | 7,875     | 38.12 (37.46, 38.79) | 20,655             | 5,034     | 24.37 (23.79, 24.96) |
| London                 | 15,763         | 6,226     | 39.50 (38.73, 40.27) | 15,767             | 4,206     | 26.68 (25.99, 27.37) |

|                                 |        |        |                      |        |       |                      |
|---------------------------------|--------|--------|----------------------|--------|-------|----------------------|
| South East Coast                | 19,290 | 7,355  | 38.13 (37.44, 38.82) | 19,294 | 5,222 | 27.07 (26.44, 27.70) |
| Northern Ireland                | 6,430  | 2,385  | 37.09 (35.91, 38.29) | 6,434  | 1,800 | 27.98 (26.88, 29.09) |
| Scotland                        | 20,521 | 7,776  | 37.89 (37.23, 38.56) | 20,519 | 6,213 | 30.28 (29.65, 30.91) |
| Wales                           | 23,890 | 9,764  | 40.87 (40.25, 41.50) | 23,891 | 7,360 | 30.81 (30.22, 31.40) |
| <b>Type 2 diabetes mellitus</b> |        |        |                      |        |       |                      |
| North East                      | 4,593  | 296    | 6.44 (5.75, 7.19)    | 4,593  | 296   | 6.44 (5.75, 7.19)    |
| North West                      | 27,200 | 2,292  | 8.43 (8.10, 8.76)    | 27,205 | 2,208 | 8.12 (7.79, 8.45)    |
| Yorkshire & The Humber          | 9,277  | 559    | 6.03 (5.55, 6.53)    | 9,275  | 540   | 5.82 (5.35, 6.32)    |
| East Midlands                   | 8,960  | 645    | 7.20 (6.67, 7.75)    | 8,957  | 624   | 6.97 (6.45, 7.51)    |
| West Midlands                   | 22,256 | 1,792  | 8.05 (7.70, 8.42)    | 22,250 | 1,766 | 7.94 (7.59, 8.30)    |
| East of England                 | 18,103 | 1,285  | 7.10 (6.73, 7.48)    | 18,101 | 1,167 | 6.45 (6.09, 6.81)    |
| South West                      | 18,251 | 1,567  | 8.59 (8.18, 9.00)    | 18,249 | 1,275 | 6.99 (6.62, 7.37)    |
| South Central                   | 20,656 | 1,658  | 8.03 (7.66, 8.41)    | 20,655 | 1,315 | 6.37 (6.04, 6.71)    |
| London                          | 15,763 | 1,630  | 10.34 (9.87, 10.83)  | 15,767 | 1,329 | 8.43 (8.00, 8.87)    |
| South East Coast                | 19,290 | 1,669  | 8.65 (8.26, 9.06)    | 19,294 | 1,372 | 7.11 (6.75, 7.48)    |
| Northern Ireland                | 6,430  | 521    | 8.10 (7.45, 8.80)    | 6,434  | 511   | 7.94 (7.29, 8.63)    |
| Scotland                        | 20,521 | 1,818  | 8.86 (8.47, 9.26)    | 20,519 | 1,789 | 8.72 (8.34, 9.11)    |
| Wales                           | 23,890 | 2,428  | 10.16 (9.78, 10.55)  | 23,891 | 2,177 | 9.11 (8.75, 9.48)    |
| <b>Obesity</b>                  |        |        |                      |        |       |                      |
| North East                      | 4,593  | 1,708  | 37.19 (35.79, 38.59) | 4,593  | 1,290 | 28.09 (26.79, 29.39) |
| North West                      | 27,200 | 10,048 | 36.94 (36.36, 37.51) | 27,205 | 7,977 | 29.32 (28.78, 29.86) |
| Yorkshire & The Humber          | 9,277  | 3,209  | 34.59 (33.62, 35.56) | 9,275  | 2,352 | 25.36 (24.47, 26.24) |
| East Midlands                   | 8,960  | 3,143  | 35.08 (34.09, 36.07) | 8,957  | 2,480 | 27.69 (26.76, 28.61) |
| West Midlands                   | 22,256 | 8,295  | 37.27 (36.64, 37.91) | 22,250 | 6,657 | 29.92 (29.32, 30.53) |
| East of England                 | 18,103 | 5,956  | 32.90 (32.22, 33.59) | 18,101 | 4,527 | 25.01 (24.38, 25.64) |
| South West                      | 18,251 | 6,554  | 35.91 (35.22, 36.61) | 18,249 | 4,652 | 25.49 (24.86, 26.12) |
| South Central                   | 20,656 | 7,248  | 35.09 (34.44, 35.74) | 20,655 | 5,242 | 25.38 (24.79, 25.98) |
| London                          | 15,763 | 5,763  | 36.56 (35.81, 37.31) | 15,767 | 4,306 | 27.31 (26.61, 28.01) |
| South East Coast                | 19,290 | 6,667  | 34.56 (33.88, 35.23) | 19,294 | 5,053 | 26.19 (25.57, 26.81) |
| Northern Ireland                | 6,430  | 2,519  | 39.17 (37.97, 40.36) | 6,434  | 2,028 | 31.52 (30.38, 32.66) |
| Scotland                        | 20,521 | 8,543  | 41.63 (40.96, 42.31) | 20,519 | 6,818 | 33.23 (32.58, 33.87) |
| Wales                           | 23,890 | 9,976  | 41.76 (41.14, 42.39) | 23,891 | 7,710 | 32.27 (31.68, 32.86) |

| <b>Dyslipidaemia</b>                           |        |        |                      |        |        |                      |
|------------------------------------------------|--------|--------|----------------------|--------|--------|----------------------|
| North East                                     | 4,593  | 3,393  | 73.88 (72.60, 75.15) | 4,593  | 2,857  | 62.20 (60.80, 63.61) |
| North West                                     | 27,200 | 19,268 | 70.84 (70.30, 71.38) | 27,205 | 16,622 | 61.10 (60.52, 61.67) |
| Yorkshire & The Humber                         | 9,277  | 5,910  | 63.71 (62.73, 64.68) | 9,275  | 5,016  | 54.08 (53.07, 55.10) |
| East Midlands                                  | 8,960  | 5,070  | 56.59 (55.57, 57.62) | 8,957  | 4,717  | 52.66 (51.63, 53.70) |
| West Midlands                                  | 22,256 | 15,492 | 69.61 (69.01, 70.21) | 22,250 | 13,285 | 59.71 (59.06, 60.35) |
| East of England                                | 18,103 | 12,178 | 67.27 (66.59, 67.95) | 18,101 | 9,919  | 54.80 (54.07, 55.52) |
| South West                                     | 18,251 | 12,305 | 67.42 (66.74, 68.10) | 18,249 | 9,564  | 52.41 (51.69, 53.14) |
| South Central                                  | 20,656 | 14,377 | 69.60 (68.97, 70.23) | 20,655 | 11,321 | 54.81 (54.13, 55.49) |
| London                                         | 15,763 | 10,839 | 68.76 (68.03, 69.48) | 15,767 | 8,938  | 56.69 (55.91, 57.46) |
| South East Coast                               | 19,290 | 13,272 | 68.80 (68.15, 69.46) | 19,294 | 11,108 | 57.57 (56.87, 58.27) |
| Northern Ireland                               | 6,430  | 4,485  | 69.75 (68.63, 70.87) | 6,434  | 3,919  | 60.91 (59.72, 62.10) |
| Scotland                                       | 20,521 | 13,610 | 66.32 (65.67, 66.96) | 20,519 | 11,474 | 55.92 (55.24, 56.60) |
| Wales                                          | 23,890 | 16,838 | 70.48 (69.90, 71.06) | 23,891 | 14,194 | 59.41 (58.78, 60.03) |
| <b>Having <math>\geq 1</math> risk factors</b> |        |        |                      |        |        |                      |
| North East                                     | 4,593  | 4,133  | 89.98 (89.12, 90.85) | 4,593  | 3,574  | 77.81 (76.61, 79.02) |
| North West                                     | 27,200 | 24,559 | 90.29 (89.93, 90.64) | 27,205 | 21,446 | 78.83 (78.34, 79.31) |
| Yorkshire & The Humber                         | 9,277  | 7,911  | 85.28 (84.55, 86.00) | 9,275  | 6,716  | 72.41 (71.50, 73.32) |
| East Midlands                                  | 8,960  | 7,507  | 83.78 (83.02, 84.55) | 8,957  | 6,518  | 72.77 (71.85, 73.69) |
| West Midlands                                  | 22,256 | 19,988 | 89.81 (89.41, 90.20) | 22,250 | 17,319 | 77.84 (77.30, 78.39) |
| East of England                                | 18,103 | 15,612 | 86.24 (85.74, 86.74) | 18,101 | 12,978 | 71.70 (71.04, 72.35) |
| South West                                     | 18,251 | 16,108 | 88.26 (87.80, 88.73) | 18,249 | 12,384 | 67.86 (67.18, 68.53) |
| South Central                                  | 20,656 | 18,231 | 88.26 (87.83, 88.70) | 20,655 | 14,392 | 69.68 (69.06, 70.31) |
| London                                         | 15,763 | 14,117 | 89.56 (89.09, 90.04) | 15,767 | 11,541 | 73.20 (72.51, 73.89) |
| South East Coast                               | 19,290 | 16,958 | 87.91 (87.45, 88.37) | 19,294 | 14,137 | 73.27 (72.64, 73.89) |
| Northern Ireland                               | 6,430  | 5,787  | 90.00 (89.27, 90.73) | 6,434  | 4,997  | 77.67 (76.65, 78.68) |
| Scotland                                       | 20,521 | 18,169 | 88.54 (88.10, 88.97) | 20,519 | 15,736 | 76.69 (76.12, 77.27) |

|                                                |        |        |                      |        |        |                      |
|------------------------------------------------|--------|--------|----------------------|--------|--------|----------------------|
| Wales                                          | 23,890 | 21,561 | 90.25 (89.87, 90.62) | 23,891 | 18,183 | 76.11 (75.57, 76.65) |
| <b>Having <math>\geq 2</math> risk factors</b> |        |        |                      |        |        |                      |
| North East                                     | 4,593  | 2,657  | 57.85 (56.42, 59.28) | 4,593  | 2,033  | 44.26 (42.83, 45.70) |
| North West                                     | 27,200 | 15,757 | 57.93 (57.34, 58.51) | 27,205 | 12,392 | 45.55 (44.96, 46.14) |
| Yorkshire & The Humber                         | 9,277  | 4,884  | 52.65 (51.63, 53.66) | 9,275  | 3,544  | 38.21 (37.22, 39.20) |
| East Midlands                                  | 8,960  | 4,550  | 50.78 (49.75, 51.82) | 8,957  | 3,593  | 40.11 (39.10, 41.13) |
| West Midlands                                  | 22,256 | 12,615 | 56.68 (56.03, 57.33) | 22,250 | 9,912  | 44.55 (43.90, 45.20) |
| East of England                                | 18,103 | 9,535  | 52.67 (51.94, 53.40) | 18,101 | 7,021  | 38.79 (38.08, 39.50) |
| South West                                     | 18,251 | 10,241 | 56.11 (55.39, 56.83) | 18,249 | 6,907  | 37.85 (37.15, 38.56) |
| South Central                                  | 20,656 | 11,392 | 55.15 (54.47, 55.83) | 20,655 | 7,816  | 37.84 (37.17, 38.50) |
| London                                         | 15,763 | 9,020  | 57.22 (56.44, 57.99) | 15,767 | 6,472  | 41.05 (40.29, 41.82) |
| South East Coast                               | 19,290 | 10,395 | 53.89 (53.18, 54.59) | 19,294 | 7,615  | 39.47 (38.78, 40.16) |
| Northern Ireland                               | 6,430  | 3,722  | 57.88 (56.68, 59.09) | 6,434  | 2,926  | 45.48 (44.26, 46.69) |
| Scotland                                       | 20,521 | 11,910 | 58.04 (57.36, 58.71) | 20,519 | 9,392  | 45.77 (45.09, 46.45) |
| Wales                                          | 23,890 | 14,513 | 60.75 (60.13, 61.36) | 23,891 | 11,009 | 46.08 (45.44, 46.71) |
| <b>Having <math>\geq 3</math> risk factors</b> |        |        |                      |        |        |                      |
| North East                                     | 4,593  | 1,114  | 24.25 (23.01, 25.49) | 4,593  | 807    | 17.57 (16.47, 18.67) |
| North West                                     | 27,200 | 6,593  | 24.24 (23.73, 24.75) | 27,205 | 5,052  | 18.57 (18.11, 19.04) |
| Yorkshire & The Humber                         | 9,277  | 1,984  | 21.39 (20.55, 22.22) | 9,275  | 1,381  | 14.89 (14.16, 15.61) |
| East Midlands                                  | 8,960  | 1,814  | 20.25 (19.41, 21.08) | 8,957  | 1,459  | 16.29 (15.52, 17.05) |
| West Midlands                                  | 22,256 | 5,310  | 23.86 (23.30, 24.42) | 22,250 | 4,052  | 18.21 (17.7, 18.71)  |
| East of England                                | 18,103 | 3,834  | 21.18 (20.58, 21.77) | 18,101 | 2,719  | 15.02 (14.50, 15.54) |
| South West                                     | 18,251 | 4,262  | 23.35 (22.73, 23.96) | 18,249 | 2,796  | 15.32 (14.79, 15.84) |
| South Central                                  | 20,656 | 4,672  | 22.62 (22.05, 23.19) | 20,655 | 2,906  | 14.07 (13.60, 14.54) |
| London                                         | 15,763 | 3,912  | 24.82 (24.15, 25.50) | 15,767 | 2,538  | 16.10 (15.53, 16.68) |
| South East Coast                               | 19,290 | 4,238  | 21.97 (21.39, 22.56) | 19,294 | 2,906  | 15.06 (14.56, 15.57) |
| Northern Ireland                               | 6,430  | 1,570  | 24.41 (23.36, 25.46) | 6,434  | 1,211  | 18.82 (17.87, 19.78) |

---

|          |        |       |                      |        |       |                      |
|----------|--------|-------|----------------------|--------|-------|----------------------|
| Scotland | 20,521 | 5,411 | 26.37 (25.76, 26.97) | 20,519 | 4,153 | 20.24 (19.69, 20.79) |
| Wales    | 23,890 | 6,618 | 27.70 (27.13, 28.27) | 23,891 | 4,859 | 20.34 (19.83, 20.85) |

---

**Supplementary Figure S1: Flow chart of the study subjects.**

OA: osteoarthritis; CPRD: Clinical Practice Research Datalink.

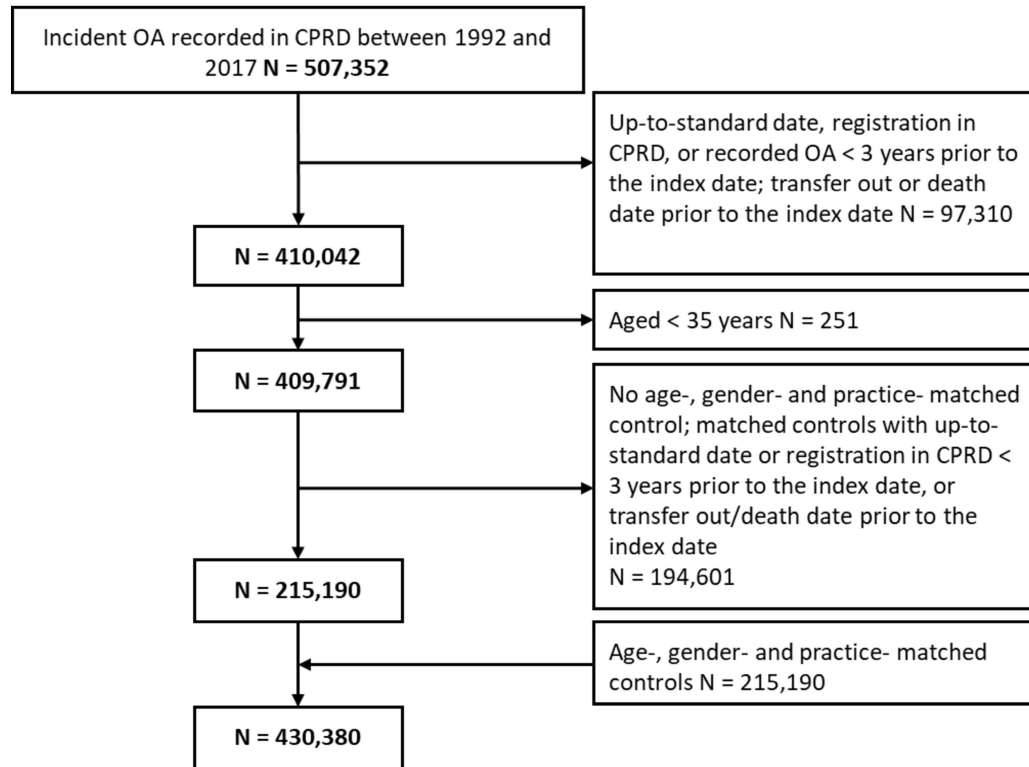

**Supplementary Figure S2: Period prevalence of single and clustering modifiable cardiovascular risk factors in osteoarthritis and non-osteoarthritis populations by sex and age group in the United Kingdom between 1992-2017.**  
 OA: osteoarthritis.

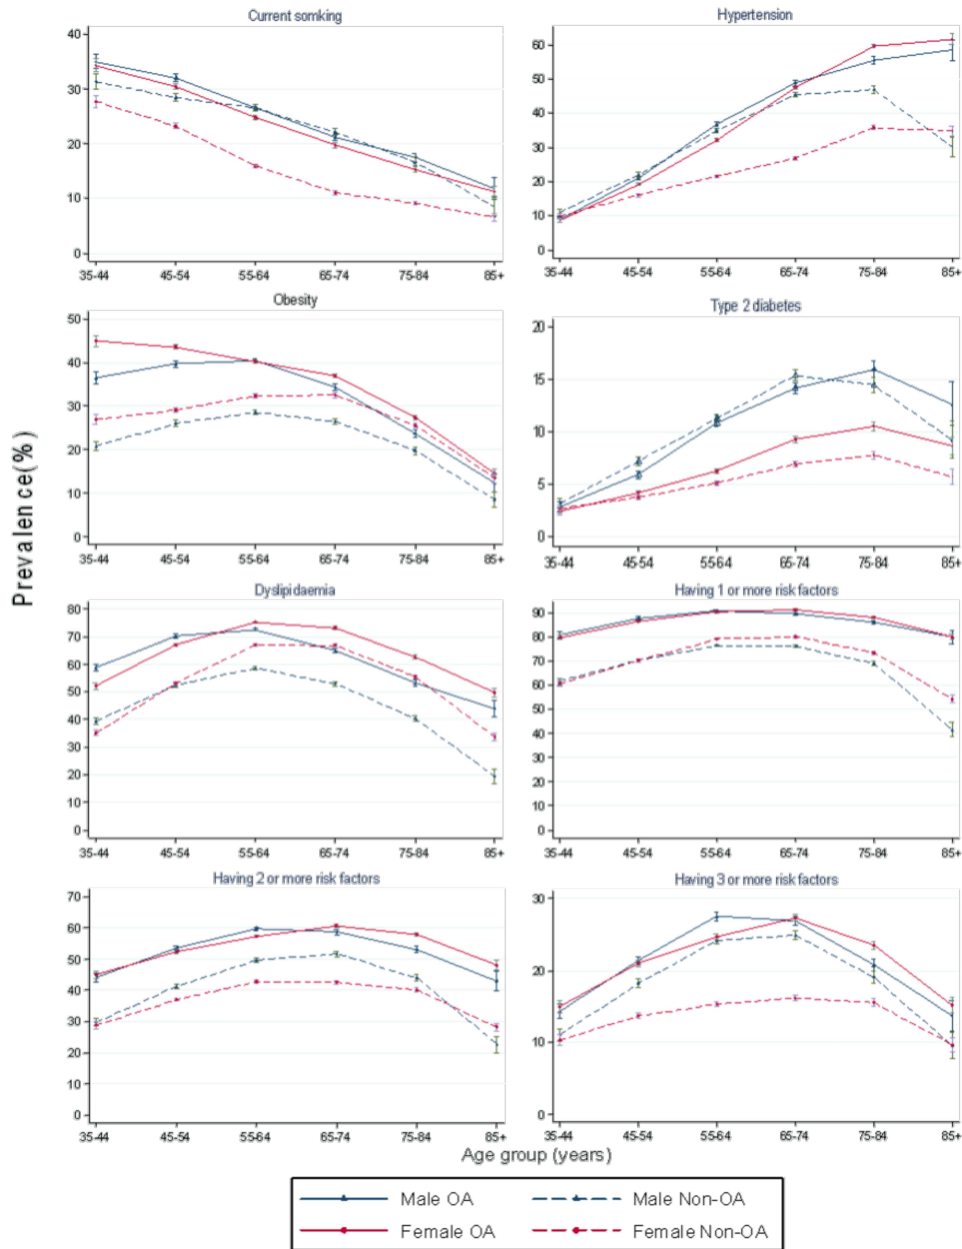



**Supplementary Figure S3: Period prevalence rates ratios for single and clustering of modifiable cardiovascular risk factors between osteoarthritis and non-osteoarthritis populations by sex and age group in the United Kingdom between 1992-2017**

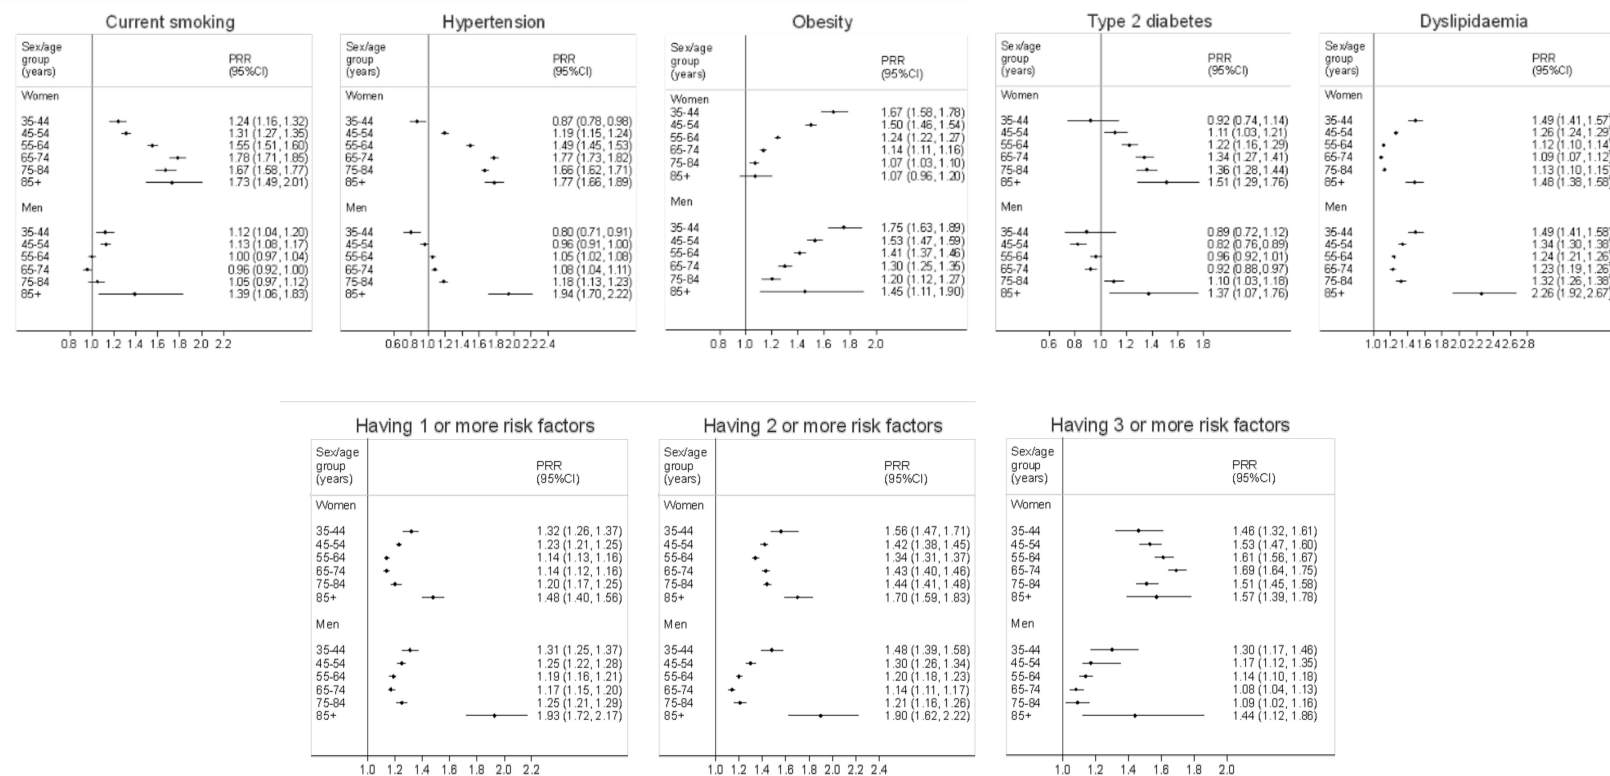

Supplement: rmdopen-2023-003298supp001.pdf [file rmdopen-2023-003298supp001.pdf]
